# Supplementary material for: New screening system using Twist1 promoter activity identifies dihydrorotenone as a potent drug targeting cancer-associated fibroblasts
Source: PubMed Central journal article supplement (PMC7184745; doi:10.1038/s41598-020-63996-4), 2020-04-27
Supplement: 41598_2020_63996_MOESM1_ESM.pdf [file 41598_2020_63996_MOESM1_ESM.pdf]

**New screening system using Twist1  
promoter activity identifies  
dihydrorotenone as a potent drug  
targeting cancer-associated  
fibroblasts**

Eunmyong Lee<sup>1\*</sup>, So-Young Yeo<sup>2\*</sup>, Keun-  
Woo Lee<sup>2\*</sup>, Jin A Lee<sup>3</sup>, Kyeong Kyu Kim<sup>2,3†</sup>,  
Seok-Hyung Kim<sup>2,4†</sup>

## **Supplementary Methods**

### **Histological analysis and immunohistochemistry**

For immunostaining, slides were deparaffinized and antigen retrieval was performed in Tris-EDTA buffer (pH 9.25). After quenching peroxidase activity and blocking nonspecific binding, slides were incubated with anti-Twist1 (Cat: ab50887, Abcam, Cambridge, MA), anti-alpha-SMA (Cat: m0851, DAKO, Santa Clara, CA), anti-Ki-67 (Cat: 8D5, Cell Signaling, Danvers, MA), and anti-cleaved caspase-3 antibody (Cat: D175, Cell Signaling, Danvers, MA) for 2 hours. Slides were developed with AEC (3-amino-9-ethylcarbazole) solution (Cat: sk-4205, Vector), counterstained with hematoxylin, dehydrated, and mounted with mounting media (Cat: 008010, Life technology).

Supplementary Table 1. Primer sequences used in this study

| Primers                | Sequence 5' → 3'             |
|------------------------|------------------------------|
| Twist1 forward         | GTCCGCAGTCTTACGAGGAG         |
| Twist1 reverse         | CCAGCTTGAGGGTCTGAATC         |
| FSP1 forward           | GATGAGCAACTTGGACAGCAA        |
| FSP1 reverse           | CTGGGCTGCTTATCTGGGAAG        |
| FAP forward            | TCAACTGTGATGGCAAGAGCA        |
| FAP reverse            | TAGGAAGTGGGTCATGTGGGT        |
| PDGFR $\alpha$ forward | AACCGTGTATAAGTCAGGGGA        |
| PDGFR $\alpha$ reverse | GCATTGTGATGCCTTTGCCTT        |
| PDGFR $\beta$ forward  | TGATGCCGAGGAACTATTCATCT      |
| PDGFR $\beta$ reverse  | TTTCTTCTCGTGCAGTGTAC         |
| $\alpha$ -SMA forward  | AGGGGGTGATGGTGGGAATG         |
| $\alpha$ -SMA reverse  | GCCCATCAGGCAACTCGTAAC        |
| IL1- $\beta$ forward   | CTCGCCAGTGAAATGATGGCT        |
| IL1- $\beta$ reverse   | GTCGGAGATTCGTAGCTGGCT        |
| IL-6 forward           | AACCTGAACCTTCCAAAGATGG       |
| IL-6 reverse           | TCTGGCTTGTTCCCTCACTACT       |
| IL-8 forward           | GAATCCTCAGCCCTCTTCAAAAAC     |
| IL-8 reverse           | GCCAAGGAGTCGTAAAGAACTTAG     |
| CXCL1 forward          | CATGCCAGCCACTGTGATAGA        |
| CXCL1 reverse          | ATTCCCCTGCCTTCACAATG         |
| CXCL2 forward          | GGTTTGCAGATATTCTCTAGTCATTTGT |
| CXCL2 reverse          | GGATTCCTCAGCCTCTATCACAGT     |
| 18S rRNA forward       | GTAACCCGTTGAACCCATT          |
| 18S rRNA reverse       | CCATCCAATCGGTAGTAGCG         |
| GAPDH forward          | GAAGATGGTGATGGGATTCCA        |
| GAPDH reverse          | GATTCCACCCATGGCAAATT         |

Related to Figure 2a

**SCAF#36**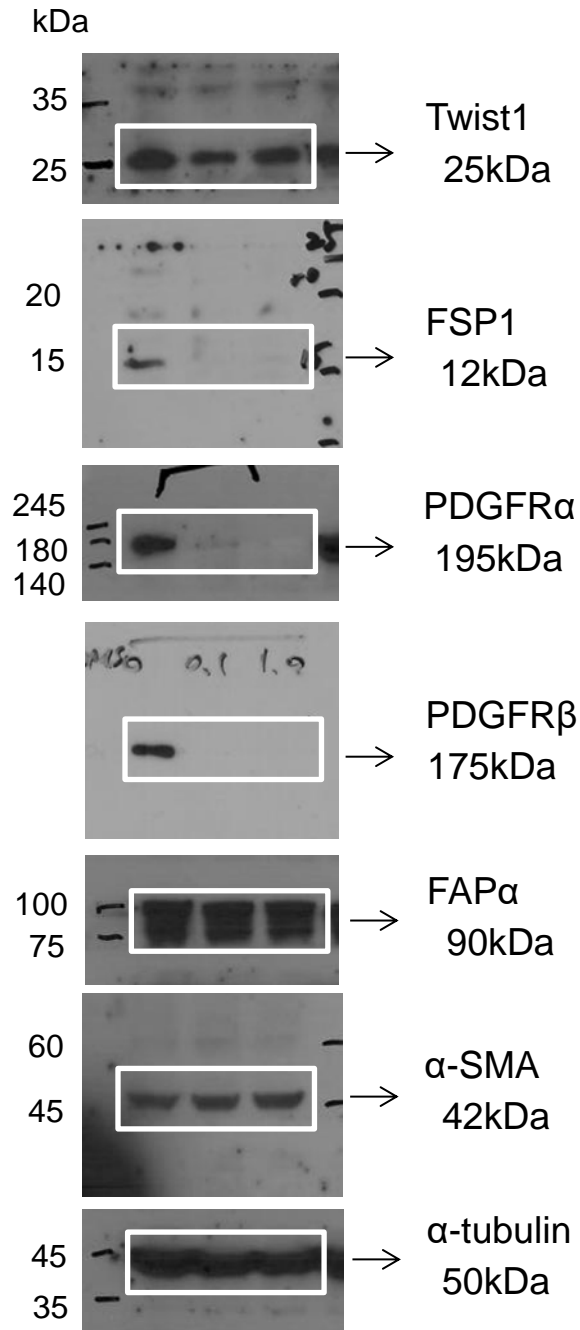

a

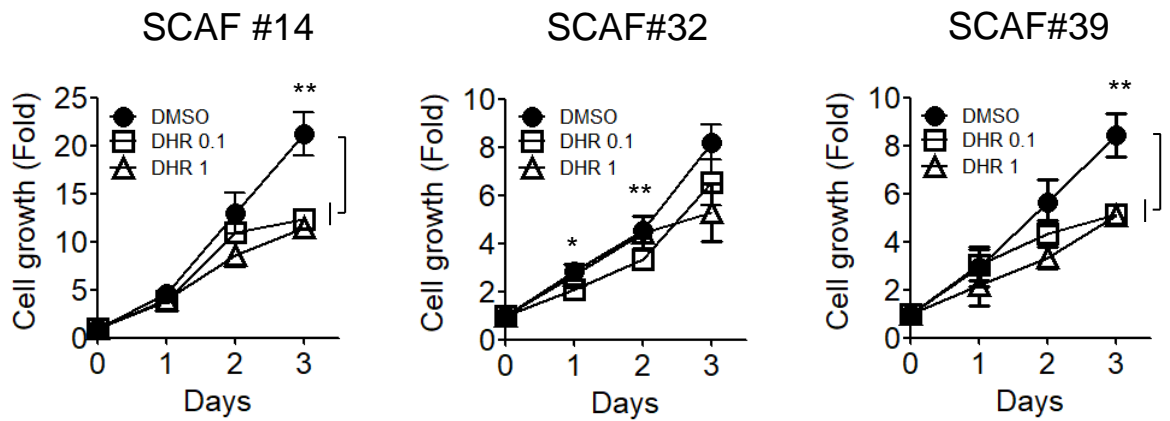

b

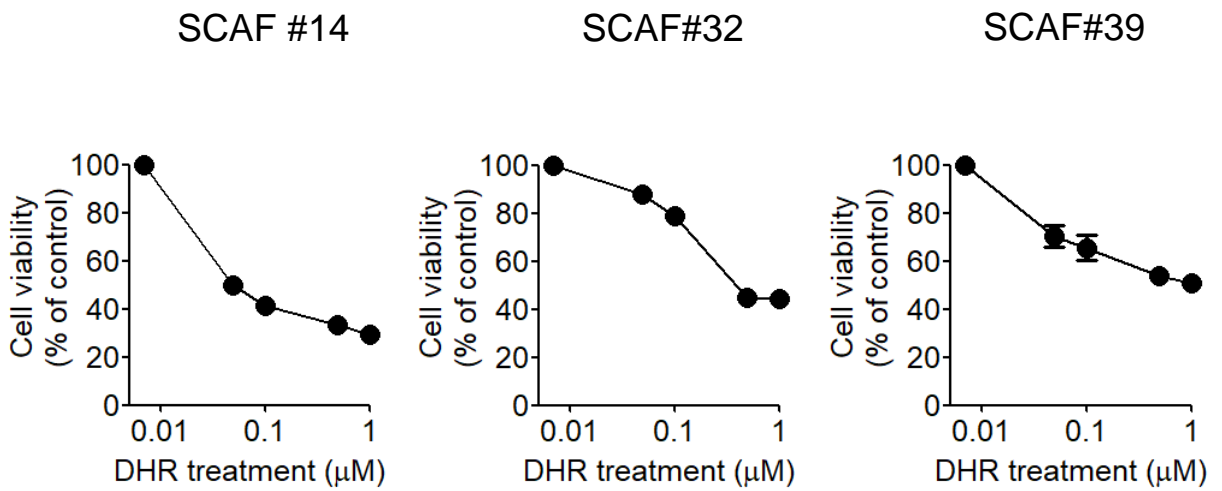

c

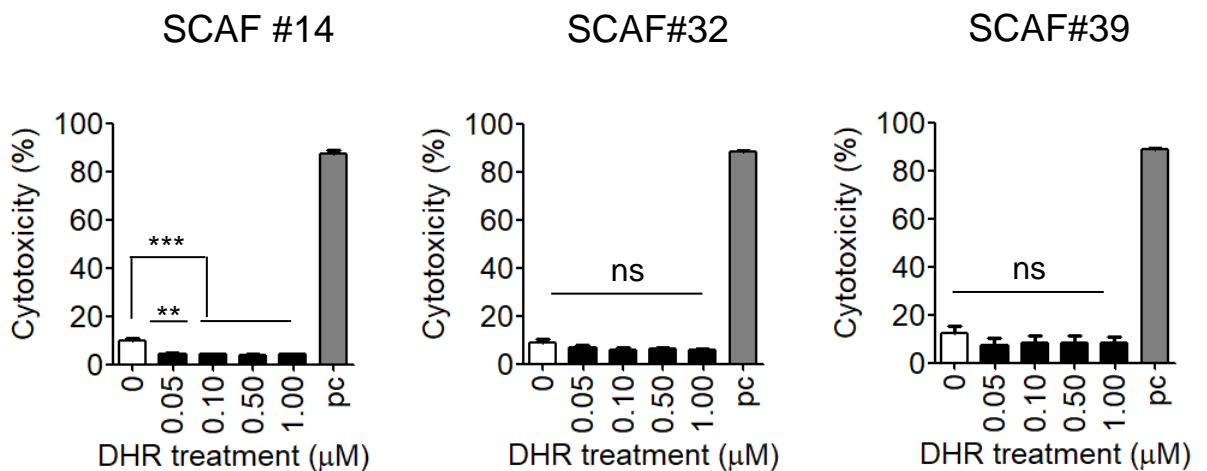

a

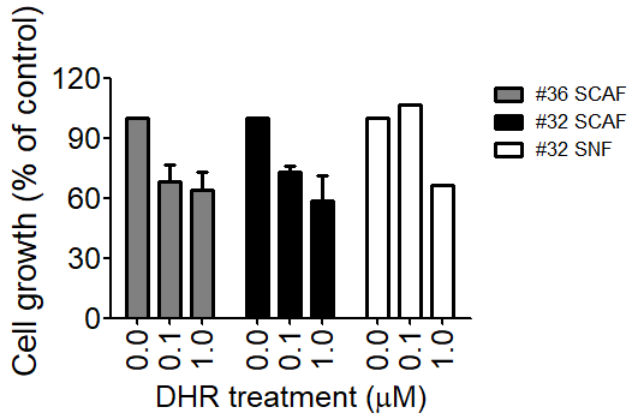

b

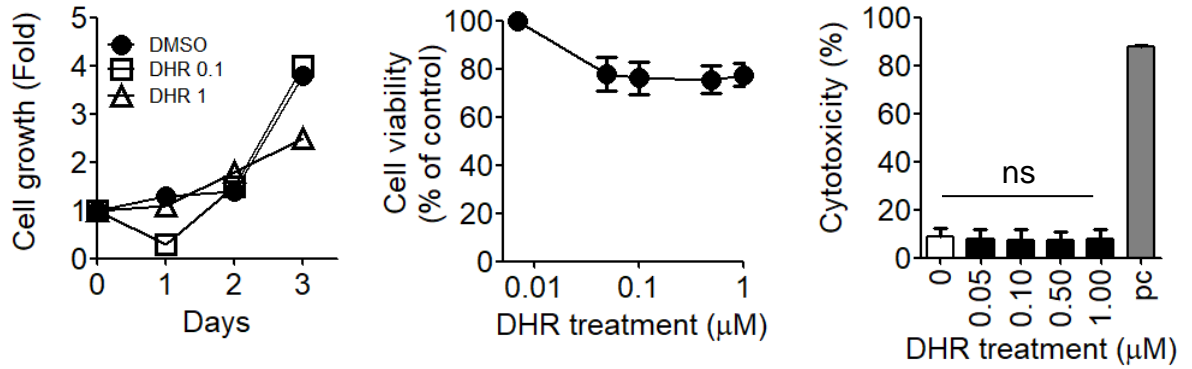

## MKN28

a

+ CM from DHR treated SCAF#14

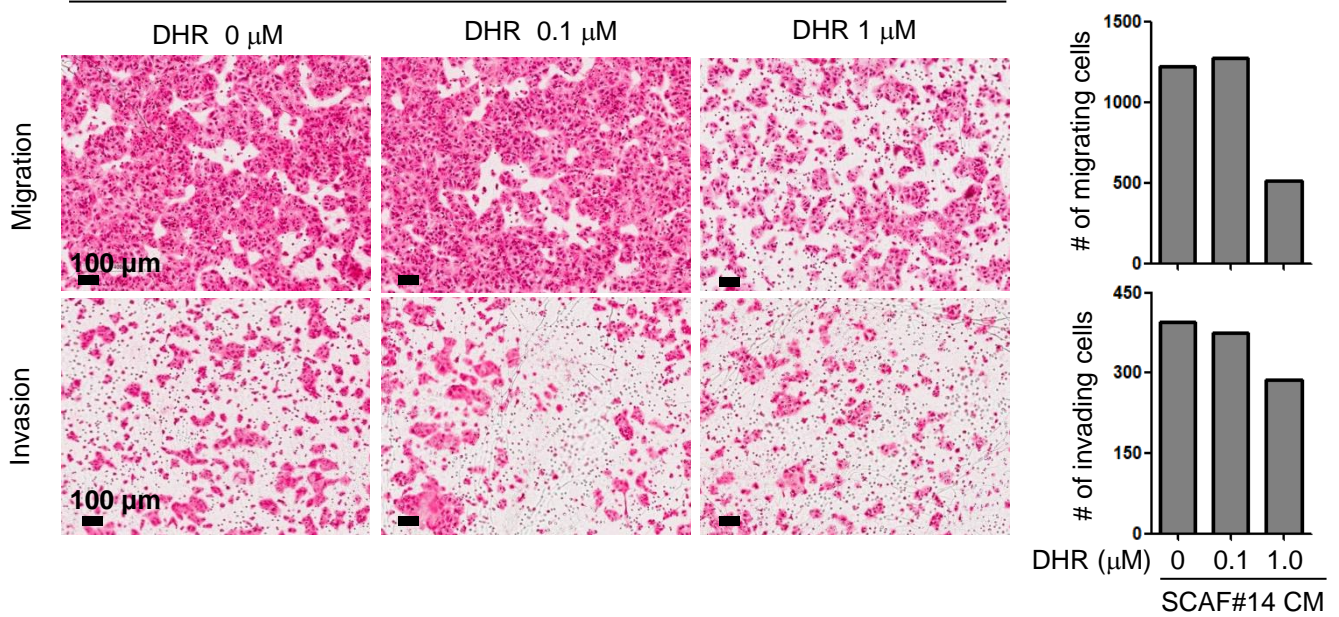

b

+ CM from DHR treated SCAF#39

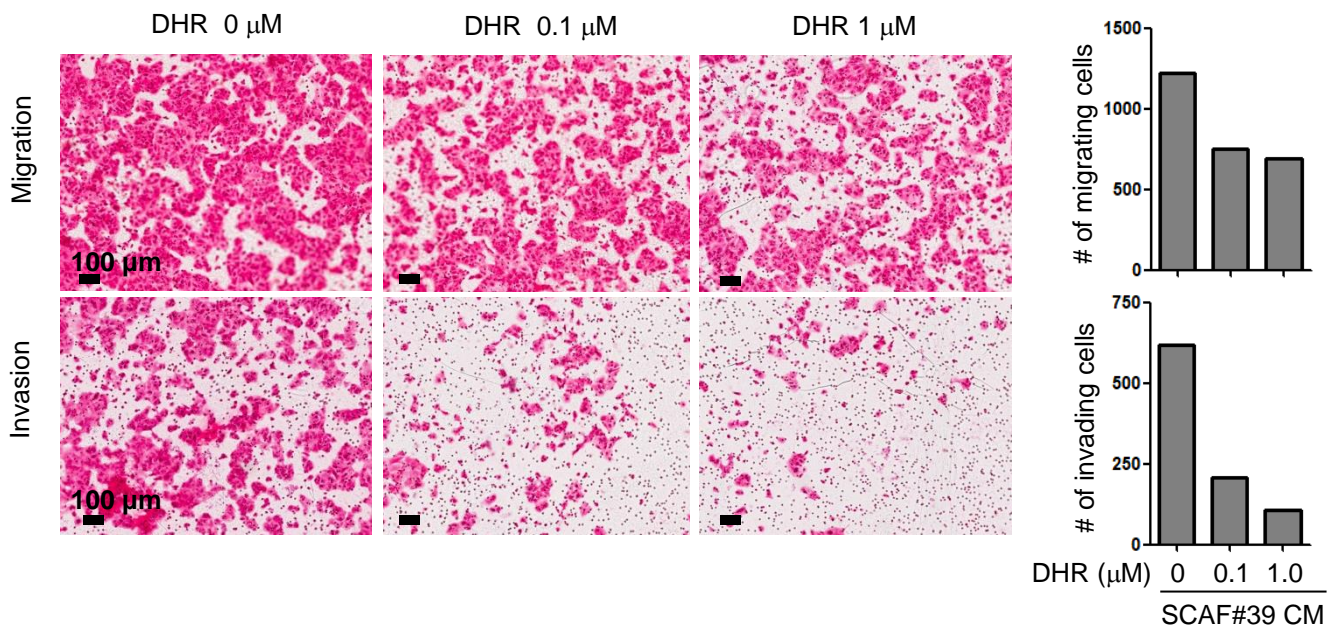

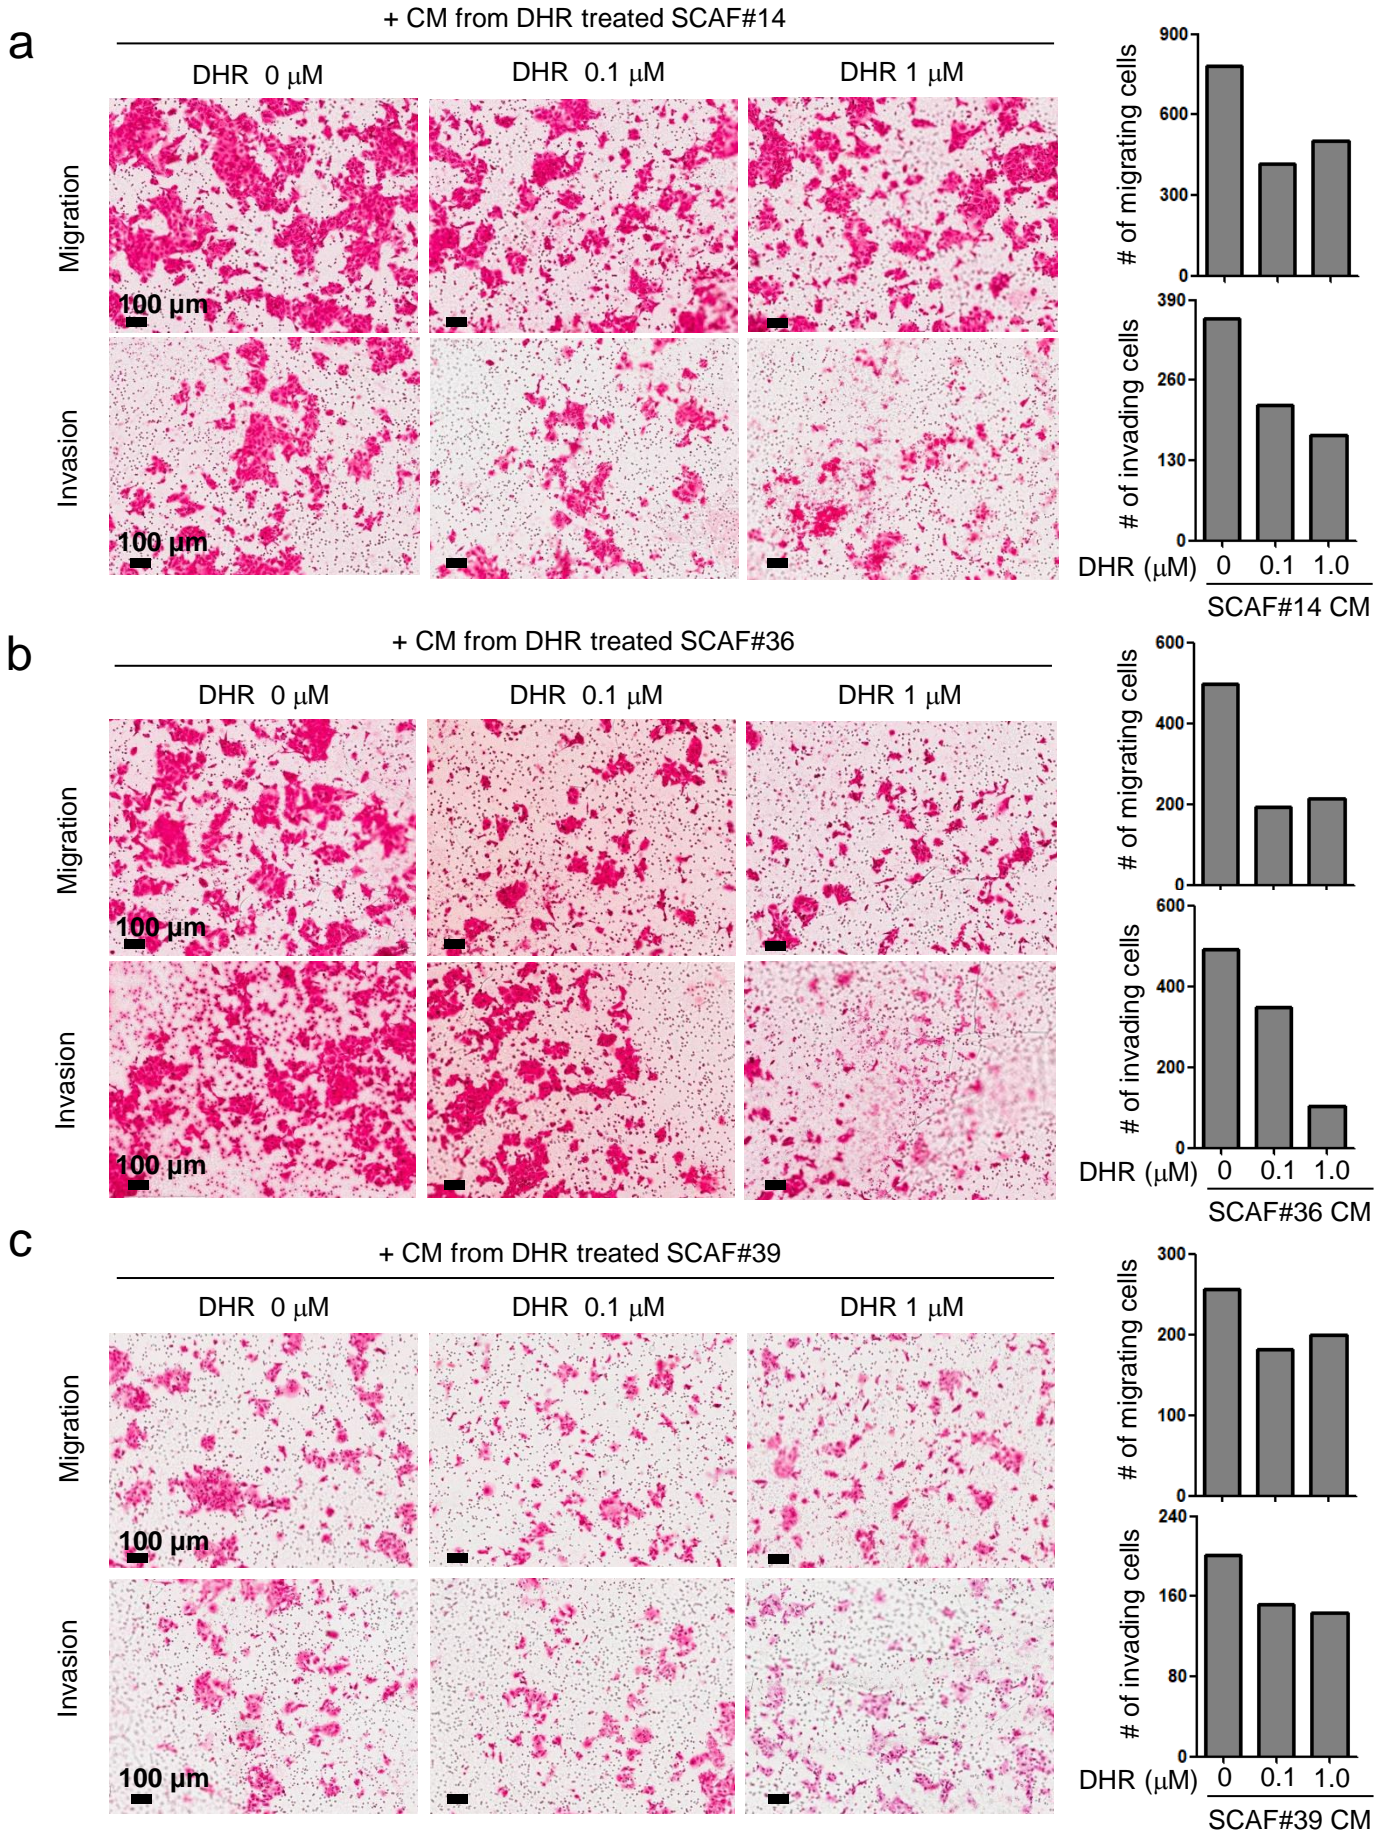



## MKN28

a

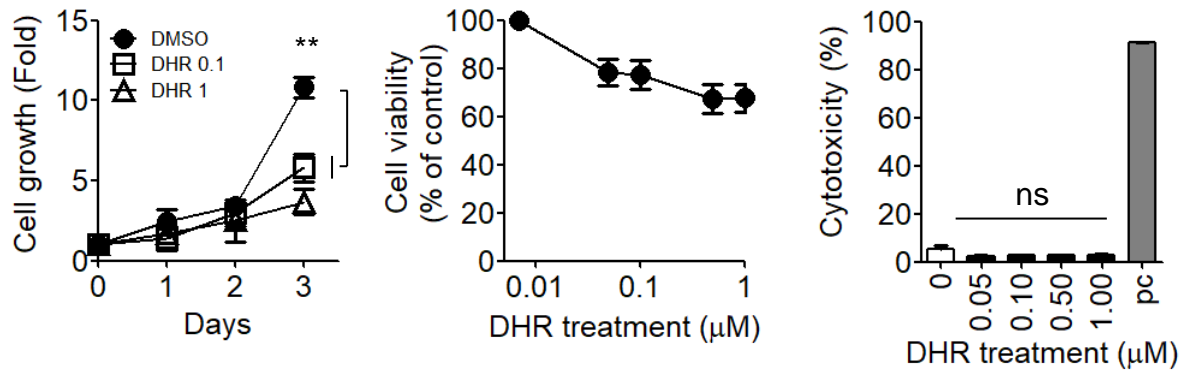

b

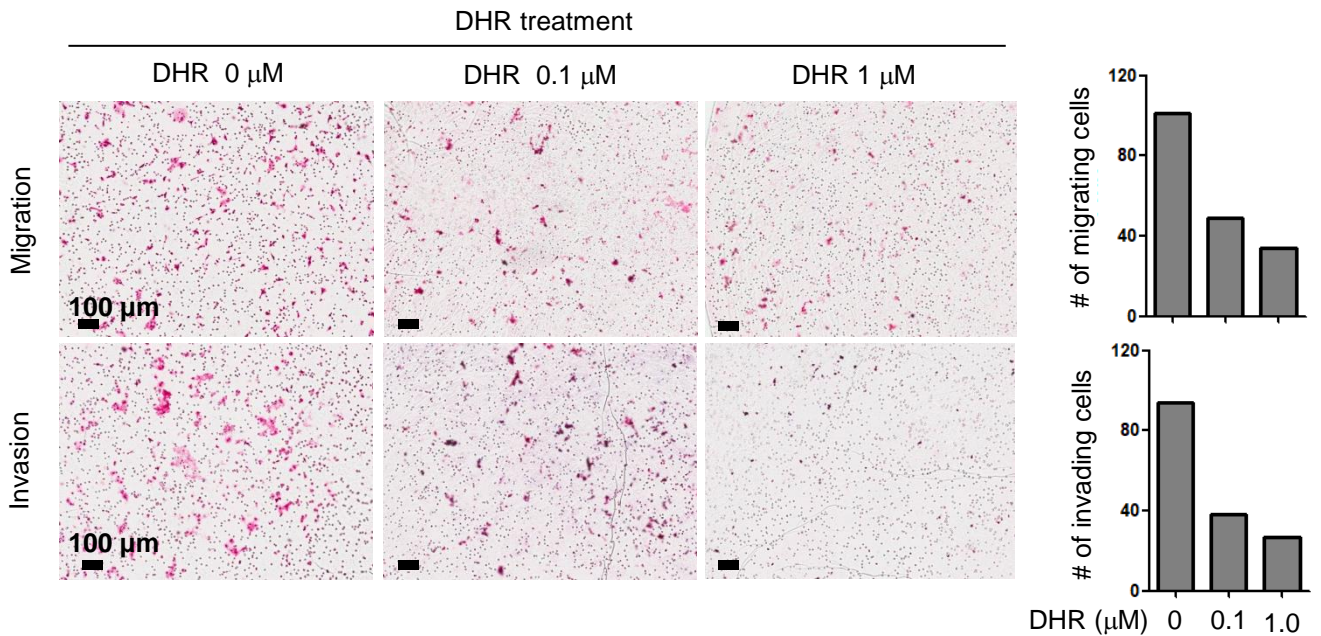

c

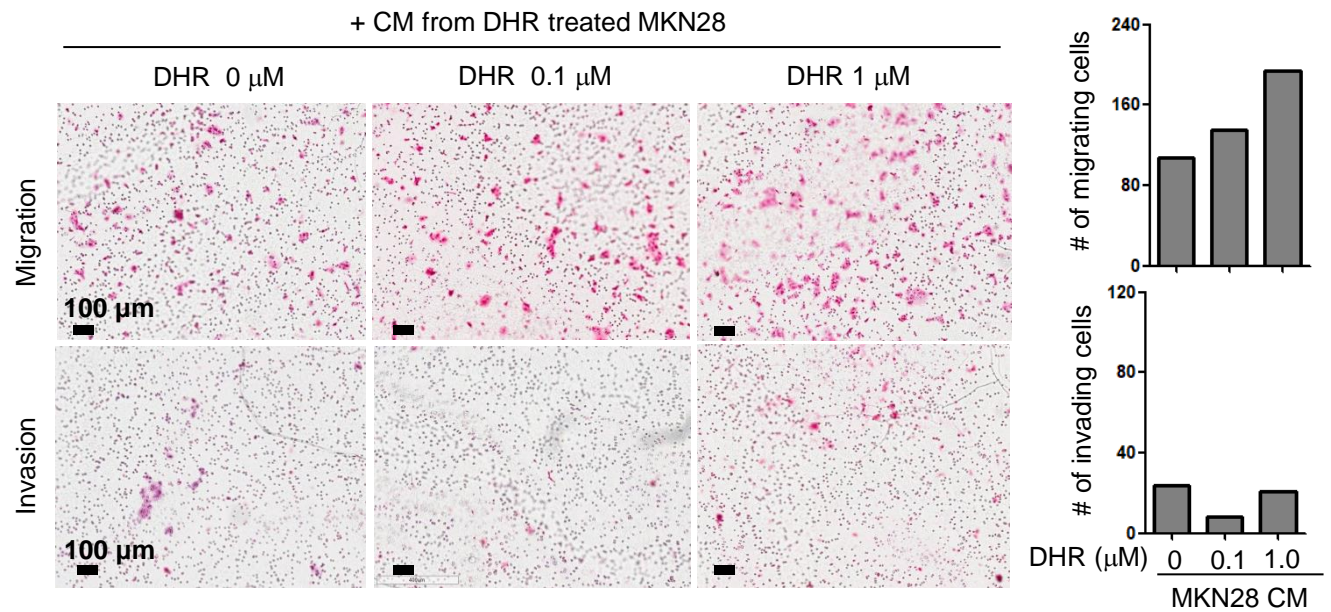

SNU668

a

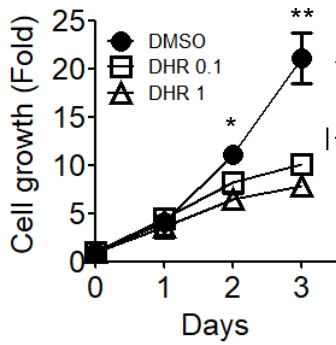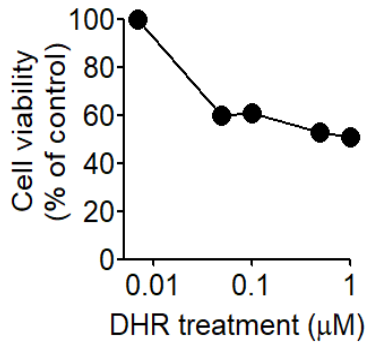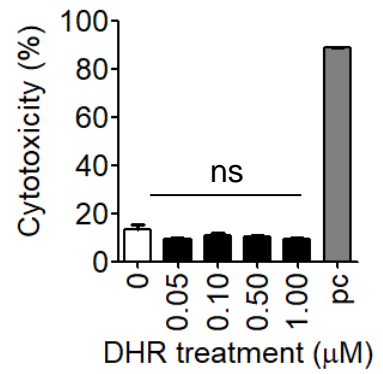

b

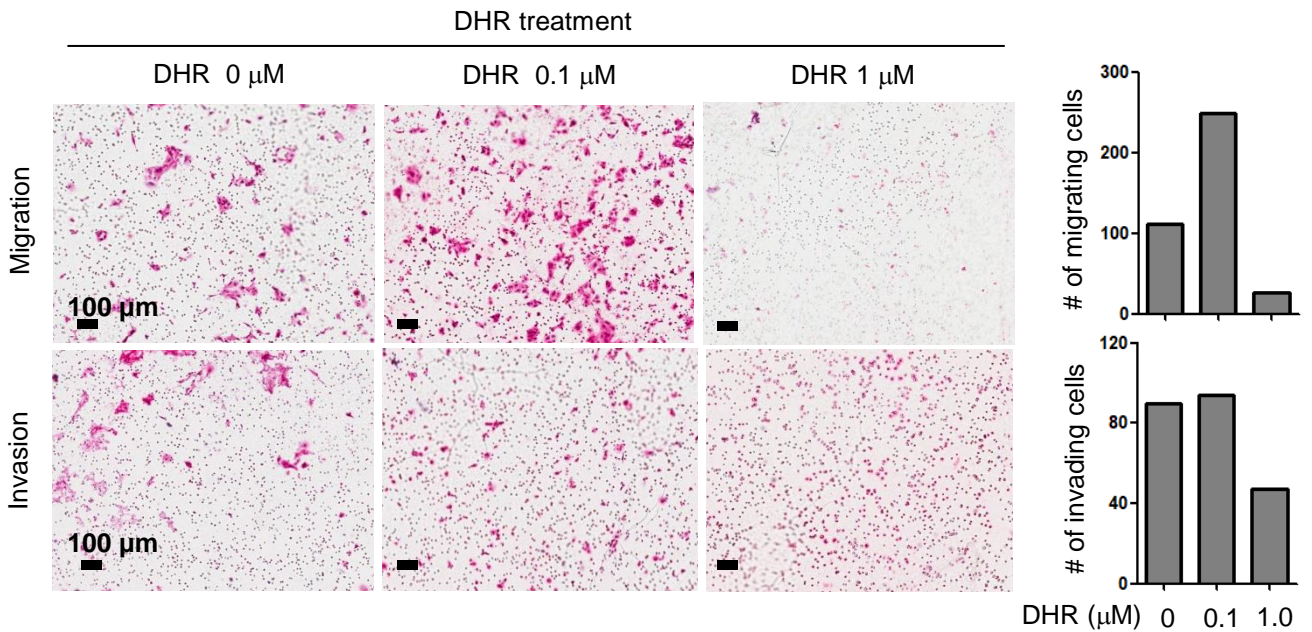

c

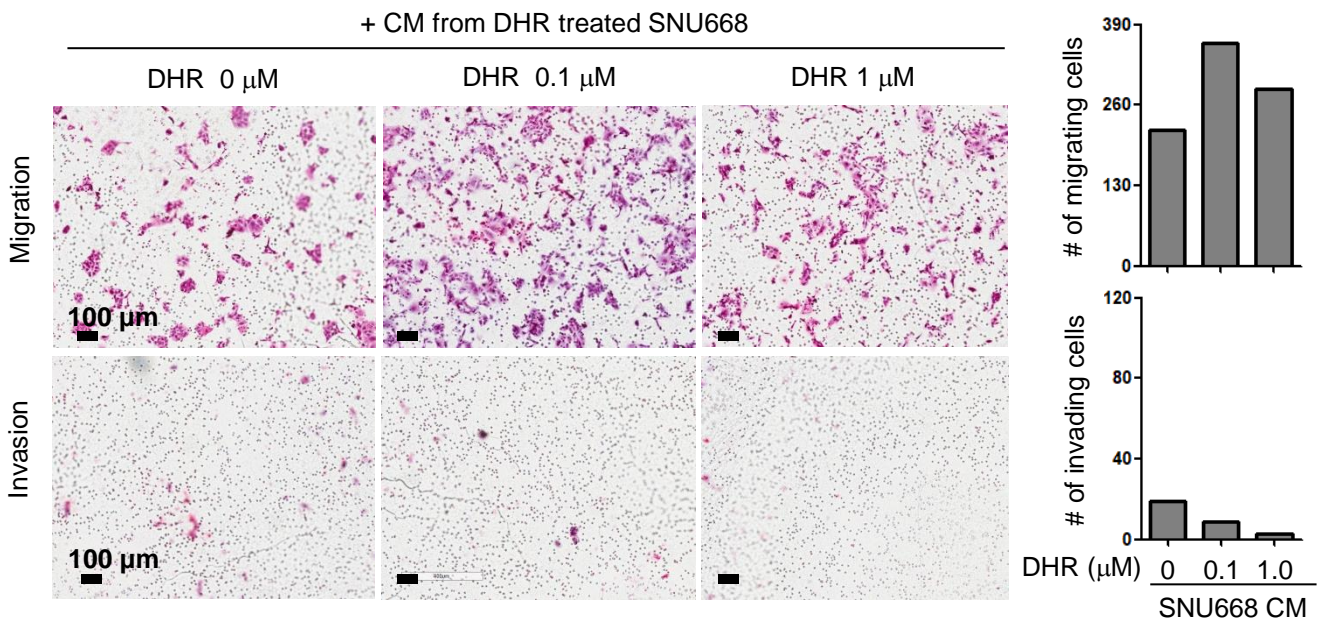

**a**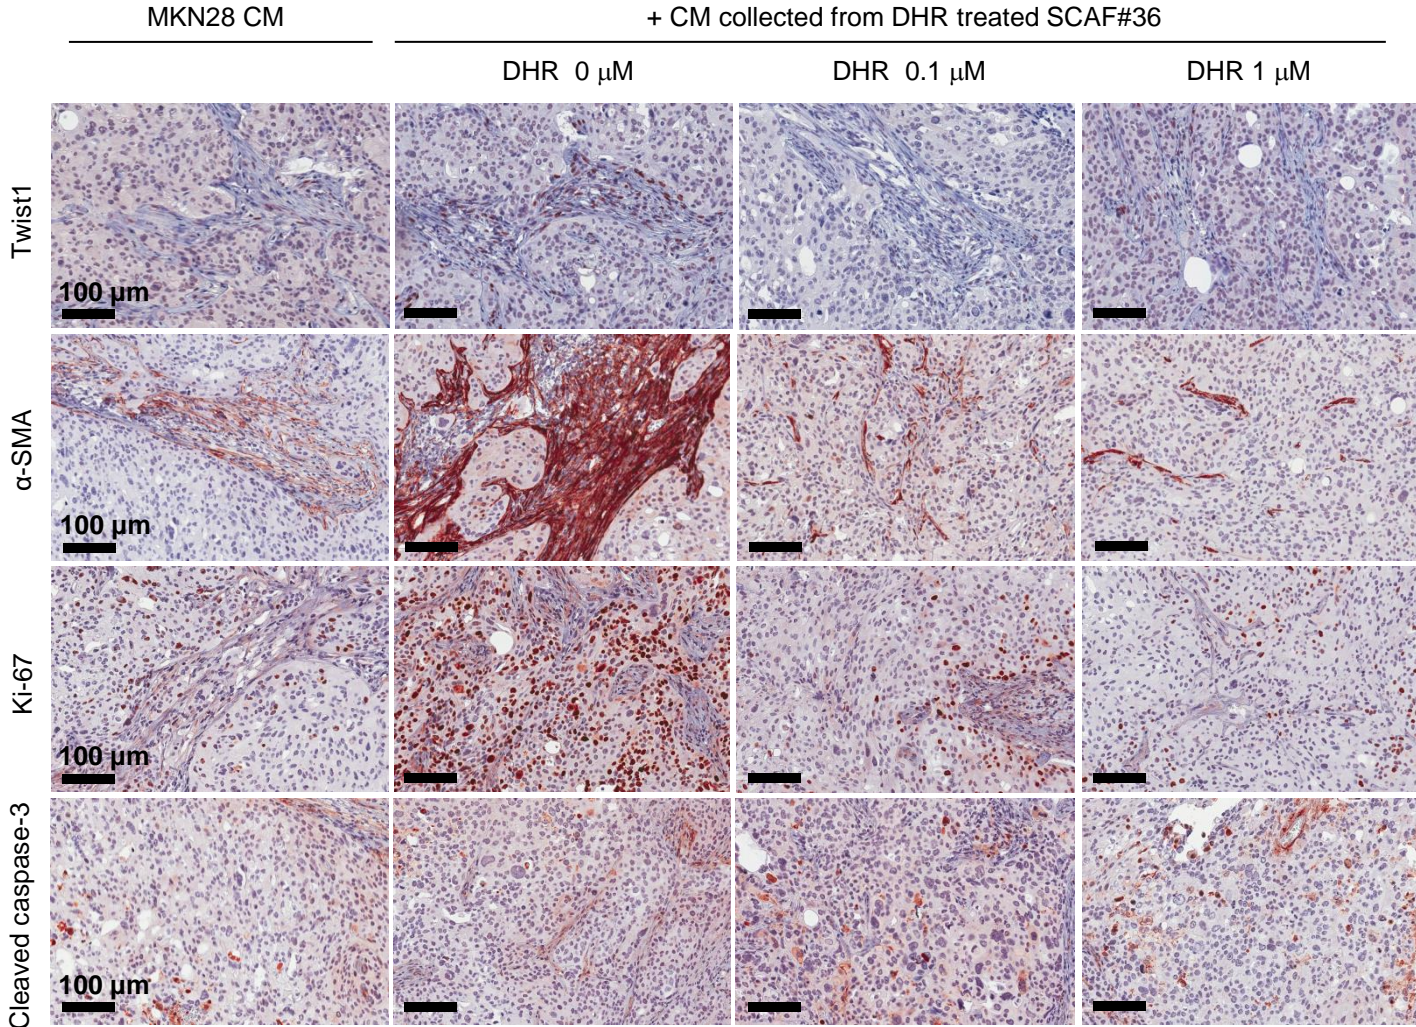**b**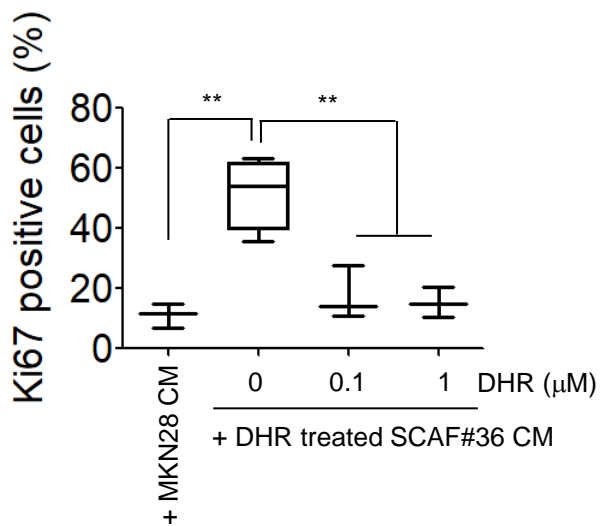**c**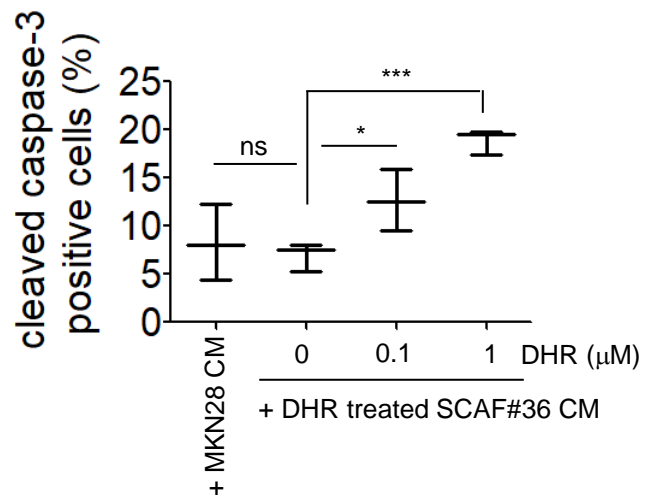

## Figure Legend

**Supplementary Figure 1** Uncropped images of western blots shown in Figure 2a with size markers are presented.

**Supplementary Figure 2. DHR treatment decreases growth rate of CAFs without inducing significant direct cytotoxicity in CAFs** SCAF#14, SCAF#32 and SCAF#39 cell proliferation, viability, and cytotoxicity under three days of DHR treatment. **(a)** SCAF#14 (**left panel**), SCAF#32 (**middle panel**), and SCAF#39 (**right panel**) cells were treated with 0.1  $\mu\text{M}$  or 1  $\mu\text{M}$  DHR, and cell proliferation was counted daily. Cell growth was normalized to day 0. Symbols represent the means  $\pm$  SEM of more than four independent experiments. Differences were evaluated by two-tailed student's t-test. \*  $P < 0.05$ ; \*\*  $P < 0.01$ . **(b)** After 72 hours of DHR treatment, cell viability of SCAF#14 (**left panel**), SCAF#32 (**middle panel**), and SCAF#39 (**right panel**) cells was assessed using an EZ-cytox kit. Symbols represent the means  $\pm$  SEM of more than three independent experiments. **(c)** The supernatants from SCAF#14 (**left panel**), SCAF#32 (**middle panel**), and SCAF#39 (**right panel**) cells treated with DHR for 72 hours were assessed for LDH release with an EZ-LDH cytotoxicity assay kit. Experiments were done in triplicate. Bars represent the means  $\pm$  SEM of more than three independent experiments. Differences were evaluated by two-tailed student's t-test.

**Supplementary Figure 3 NFs are less sensitive to DHR treatment (a)** SCAF#36, SCAF#32 and SNF#32 cell growth under three days of 0.1  $\mu\text{M}$  or 1  $\mu\text{M}$  DHR treatment. **(b)** SNF#32 cell proliferation (**left panel**), viability (**middle panel**), and cytotoxicity (**right panel**) under three days of 0.1  $\mu\text{M}$  or 1  $\mu\text{M}$  DHR treatment. Experiments were done in triplicate. Symbols and bars represent the means  $\pm$  SEM. Differences were evaluated by two-tailed student's t-test.

**Supplementary Figure 4. DHR treatment suppresses the tumor-promoting ability of CAFs** MKN28 human stomach cancer cells were incubated with appropriate conditioned medium for two days and analyzed to assess their capacity for migration and invasion. Conditioned media were prepared from SCAF#14 cells or SCAF#39 cells treated with DMSO or DHR for three days. Migration and invasion of MKN28 cells treated with conditioned medium from SCAF#14 cells **(a)** and SCAF#39 cells **(b)**.

**Supplementary Figure 5. DHR treatment suppresses the tumor-promoting ability of CAFs** SNU668 human stomach cancer cells were incubated with appropriate conditioned medium for two days and analyzed to assess their capacity for migration and invasion. Conditioned media were prepared from SCAF#14, SCAF#36, or SCAF#39 cells treated with DMSO or DHR for three days. Migration and invasion of MKN28 cells treated with conditioned medium from SCAF#14 cells **(a)**, SCAF#36 cells **(b)** and SCAF#39 cells **(c)**.

**Supplementary Figure 6 Direct DHR treatment inhibits proliferation, migration and invasion of MKN28 cells.** **(a)** Proliferation, viability, and cytotoxicity of MKN28 human stomach cancer cells under three days of DHR treatment. **(Left panel)** MKN28 cells were treated with 0.1  $\mu$ M or 1  $\mu$ M DHR, and cell proliferation was counted daily. Cell growth was normalized to day 0. Symbols represent the means  $\pm$  SEM of three independent experiments. Differences were evaluated by two-tailed student's t-test. \*\* P < 0.01. **(Middle panel)** After 72 hours of DHR treatment, cell viability of MKN28 cells was assessed using an EZ-cytox kit. Symbols represent the means  $\pm$  SEM of three independent experiments. **(Right panel)** The supernatants from MKN28 cells treated with DHR for 72 hours were assessed for LDH release with an EZ-LDH cytotoxicity assay kit. Experiments were done in triplicate. Bars represent the means  $\pm$  SEM of three independent experiments. Differences were evaluated by two-tailed student's t-test. **(b)** MKN28 cells were treated with DMSO or DHR for three days and analyzed to assess their capacity for migration and invasion. **(c)** MKN28 human stomach cancer cells were incubated with appropriate conditioned medium for two days and analyzed to assess their capacity for migration and invasion. Conditioned media were prepared from MKN28 cells treated with DMSO or DHR for three days.

**Supplementary Figure 7 Direct DHR treatment inhibits proliferation, migration and invasion of SMU668 cells.**(a) Proliferation, viability, and cytotoxicity of SNU668 human stomach cancer cells under three days of DHR treatment. **(Left panel)** SNU668 cells were treated with 0.1  $\mu$ M or 1  $\mu$ M DHR, and cell proliferation was counted daily. Cell growth was normalized to day 0. Symbols represent the means  $\pm$  SEM of four independent experiments. Differences were evaluated by two-tailed student's t-test. \*  $P < 0.05$  (DMSO versus DHR 1  $\mu$ M treatment, day2); \*\*  $P < 0.01$ . **(Middle panel)** After 72 hours of DHR treatment, cell viability of SNU668 cells was assessed using an EZ-cytox kit. Symbols represent the means  $\pm$  SEM of three independent experiments. **(Right panel)** The supernatants from SNU668 cells treated with DHR for 72 hours were assessed for LDH release with an EZ-LDH cytotoxicity assay kit. Experiments were done in triplicate. Bars represent the means  $\pm$  SEM of three independent experiments. Differences were evaluated by two-tailed student's t-test. **(b)** SNU668 cells were treated with DMSO or DHR for three days and analyzed to assess their capacity for migration and invasion. **(c)** SNU668 human stomach cancer cells were incubated with appropriate conditioned medium for two days and analyzed to assess their capacity for migration and invasion. Conditioned media were prepared from SNU668 cells treated with DMSO or DHR for three days.

**Supplementary Figure 8 Tumors subjected to DHR-treated SCAF#36 conditioned medium shows less proliferation and more cell death** **(a)** Representative photomicrography of Twist1, alpha-SMA, Ki-67 and cleaved caspase-3 stained microscopic sections of corresponding tumors. Scale bar, 100  $\mu$ m. **(b-c)** The percentage of Ki-67 **(b)** or cleaved caspase-3 **(c)** positive cells per microscopic field was calculated from a total 3 fields per tumor. Whiskers represent mean with min to max. Difference was evaluated by two-tailed student's t-test. \*  $P < 0.05$ ; \*\*  $P < 0.01$ ; \*\*\*  $P < 0.001$ .
